# Supplementary material for: Synaptic mechanisms underlying onset and progression of memory deficits caused by hippocampal and midbrain synucleinopathy
Source: PubMed Central journal article supplement (PMC10275870; doi:10.1038/s41531-023-00520-1), 2023-06-16
Supplement: 41531_2023_520_MOESM2_ESM.pdf [file 41531_2023_520_MOESM2_ESM.pdf]

## Reporting Summary

Nature Portfolio wishes to improve the reproducibility of the work that we publish. This form provides structure for consistency and transparency in reporting. For further information on Nature Portfolio policies, see our [Editorial Policies](#) and the [Editorial Policy Checklist](#).

### Statistics

For all statistical analyses, confirm that the following items are present in the figure legend, table legend, main text, or Methods section.

n/a | Confirmed

- The exact sample size ( $n$ ) for each experimental group/condition, given as a discrete number and unit of measurement
- A statement on whether measurements were taken from distinct samples or whether the same sample was measured repeatedly
- The statistical test(s) used AND whether they are one- or two-sided  
*Only common tests should be described solely by name; describe more complex techniques in the Methods section.*
- A description of all covariates tested
- A description of any assumptions or corrections, such as tests of normality and adjustment for multiple comparisons
- A full description of the statistical parameters including central tendency (e.g. means) or other basic estimates (e.g. regression coefficient) AND variation (e.g. standard deviation) or associated estimates of uncertainty (e.g. confidence intervals)
- For null hypothesis testing, the test statistic (e.g.  $F$ ,  $t$ ,  $r$ ) with confidence intervals, effect sizes, degrees of freedom and  $P$  value noted  
*Give  $P$  values as exact values whenever suitable.*
- For Bayesian analysis, information on the choice of priors and Markov chain Monte Carlo settings
- For hierarchical and complex designs, identification of the appropriate level for tests and full reporting of outcomes
- Estimates of effect sizes (e.g. Cohen's  $d$ , Pearson's  $r$ ), indicating how they were calculated

*Our web collection on [statistics for biologists](#) contains articles on many of the points above.*

### Software and code

Policy information about [availability of computer code](#)

Data collection

Data analysis

For manuscripts utilizing custom algorithms or software that are central to the research but not yet described in published literature, software must be made available to editors and reviewers. We strongly encourage code deposition in a community repository (e.g. GitHub). See the Nature Portfolio [guidelines for submitting code & software](#) for further information.

### Data

Policy information about [availability of data](#)

All manuscripts must include a [data availability statement](#). This statement should provide the following information, where applicable:

- Accession codes, unique identifiers, or web links for publicly available datasets
- A description of any restrictions on data availability
- For clinical datasets or third party data, please ensure that the statement adheres to our [policy](#)

Data are available from the corresponding author on request. Source data underlying Figs. 2c-d, 2e-f, 4d-e, 5a-d and Supplementary Figs. 2a-b, 3d-e, 4a-c, 5a-h, 6a-c are provided in Supplementary Materials file.

## Research involving human participants, their data, or biological material

Policy information about studies with [human participants or human data](#). See also policy information about [sex, gender \(identity/presentation\), and sexual orientation](#) and [race, ethnicity and racism](#).

|                                                                    |     |
|--------------------------------------------------------------------|-----|
| Reporting on sex and gender                                        | N/A |
| Reporting on race, ethnicity, or other socially relevant groupings | N/A |
| Population characteristics                                         | N/A |
| Recruitment                                                        | N/A |
| Ethics oversight                                                   | N/A |

Note that full information on the approval of the study protocol must also be provided in the manuscript.

## Field-specific reporting

Please select the one below that is the best fit for your research. If you are not sure, read the appropriate sections before making your selection.

Life sciences       Behavioural & social sciences       Ecological, evolutionary & environmental sciences

For a reference copy of the document with all sections, see [nature.com/documents/nr-reporting-summary-flat.pdf](https://www.nature.com/documents/nr-reporting-summary-flat.pdf)

## Life sciences study design

All studies must disclose on these points even when the disclosure is negative.

|                 |                                                                                                                                   |
|-----------------|-----------------------------------------------------------------------------------------------------------------------------------|
| Sample size     | Sample size was chosen based on previous literature.                                                                              |
| Data exclusions | Some animals were excluded from statistical analysis in case of procedural problems, such as lost videos                          |
| Replication     | The reproducibility of the experimental findings was verified by replicating the same results using different cohorts of animals. |
| Randomization   | Mice were allocated into experimental groups in random order.                                                                     |
| Blinding        | The investigators were blinded to experimental condition                                                                          |

## Reporting for specific materials, systems and methods

We require information from authors about some types of materials, experimental systems and methods used in many studies. Here, indicate whether each material, system or method listed is relevant to your study. If you are not sure if a list item applies to your research, read the appropriate section before selecting a response.

### Materials & experimental systems

| n/a                                 | Involved in the study                                           |
|-------------------------------------|-----------------------------------------------------------------|
| <input type="checkbox"/>            | <input checked="" type="checkbox"/> Antibodies                  |
| <input checked="" type="checkbox"/> | <input type="checkbox"/> Eukaryotic cell lines                  |
| <input checked="" type="checkbox"/> | <input type="checkbox"/> Palaeontology and archaeology          |
| <input type="checkbox"/>            | <input checked="" type="checkbox"/> Animals and other organisms |
| <input checked="" type="checkbox"/> | <input type="checkbox"/> Clinical data                          |
| <input checked="" type="checkbox"/> | <input type="checkbox"/> Dual use research of concern           |
| <input checked="" type="checkbox"/> | <input type="checkbox"/> Plants                                 |

### Methods

| n/a                                 | Involved in the study                           |
|-------------------------------------|-------------------------------------------------|
| <input checked="" type="checkbox"/> | <input type="checkbox"/> ChIP-seq               |
| <input checked="" type="checkbox"/> | <input type="checkbox"/> Flow cytometry         |
| <input checked="" type="checkbox"/> | <input type="checkbox"/> MRI-based neuroimaging |

## Antibodies

Antibodies used

The antibodies used in this study were: GluA1 (1:500; ab31232; Abcam), GluA2 (1:500; ab20673; Abcam), p-s845 (1:500; 36-8300; Invitrogen), p-s831 (1:500; AB5847; Millipore), LC3 (1:3000; NB100-2220; Novus Bio), p62 (1:500; H00008878-M01; Tebu-Bio), Synapsin 1/2 (1:1000; 106002; Synaptic System), SNAP-25 (1:1000; 111002; Synaptic System), Snapin (1:1000; 148002; Synaptic System), VAMP2 (1:1000; 104202; Synaptic System); Synaptophysin (1:1000, ab8049, Abcam), vGluT1 (1:1000; 135304; Synaptic

System), CSP $\alpha$  (1:1000, AB1576, Millipore), PSD-95 (1:1000, 124011, Synaptic System), D1DR (1:1000, sc-33660, Santa Cruz), Tyrosine Hydroxylase (1:1000, AB152, Abcam), NMDAR1 (1:1000, 320500, Invitrogen), NMDAR2A (1:1000, M264, Sigma) and NMDAR2B (1:1000, 718600, Invitrogen).  $\beta$ -actin (1:5000, MAB1501, Millipore) was used as loading control.

#### Validation

We used antibodies already validated by previous studies (De Risi et al., 2020; Giordano et al., 2018) or by manufacturer for western blot or immunofluorescence. Moreover, control of specificity of immunolabeling were performed by omission of primary antibodies.

## Animals and other research organisms

Policy information about [studies involving animals](#); [ARRIVE guidelines](#) recommended for reporting animal research, and [Sex and Gender in Research](#)

#### Laboratory animals

Experiments were performed in CD1 outbred male mice, 9–10 weeks old at the beginning of experiments.

#### Wild animals

We did not use wild animals.

#### Reporting on sex

Experiments were performed in CD1 outbred male mice.

#### Field-collected samples

No field-collected samples were used in the study.

#### Ethics oversight

All procedures relating to animal care and treatments conformed to the guidelines and policies of the European Communities Council and were approved by the Italian Ministry of Health.

Note that full information on the approval of the study protocol must also be provided in the manuscript.
